# Supplementary material for: The Stability of Medicinal Plant microRNAs in the Herb Preparation Process
Source: MDPI journal article supplement (doi:10.3390/molecules23040919), 2018-04-16
Supplement: s1 [file s1]

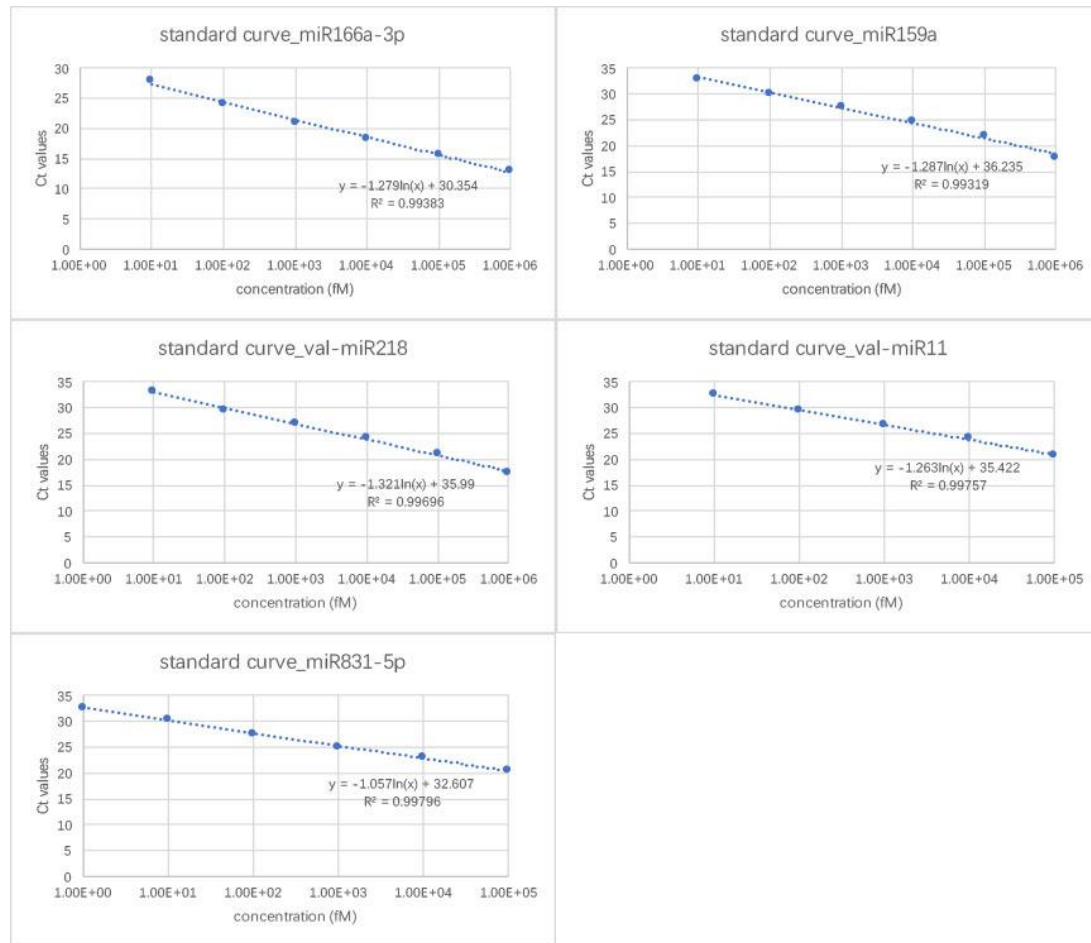

Supplementary Figure S1. Standard curves generated in qRT-PCR analysis. Synthetic single-stranded miRNA was serially diluted and assessed by the qRT-PCR assay. The resulting CT values were plotted against the miRNA amount to generate a standard curve.
